# Supplementary material
Source: Springer Nature journal article supplement (https://www.springermedizin.de/resource/supplementary/12876_2014_1089_MOESM4_ESM.pdf/9438464)

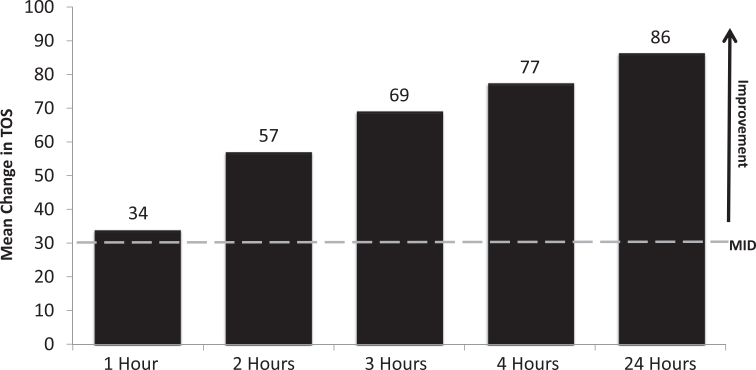

Supplement: MOESM4 [file 9438464]
